# Supplementary material for: A little spin on the side: solvent and temperature dependent paramagnetism in [RuII(bpy)2(phendione)]2+
Source: Royal Society of Chemistry journal article supplement (doi:10.1039/c4dt01868k), 2014-01-01
Supplement: c4dt01868k1.pdf [file c4dt01868k1.pdf]

**Supporting Information for:**

**A Little Spin on the Side: Solvent and Temperature Dependent Paramagnetism in  
[Ru<sup>II</sup>(bpy)<sub>2</sub>(phendione)]<sup>2+</sup>**

Robert D. Schmidt, Caleb A. Kent, Javier J. Concepcion, Wenbin Lin, Thomas J. Meyer, and  
Malcolm D. E. Forbes\*

| <b>Description</b> | <b>Page</b> |
|--------------------|-------------|
| Figure S1          | 2           |
| Table S1           | 2           |
| Figure S2          | 3           |
| Figure S3          | 4           |
| Figure S4          | 5           |

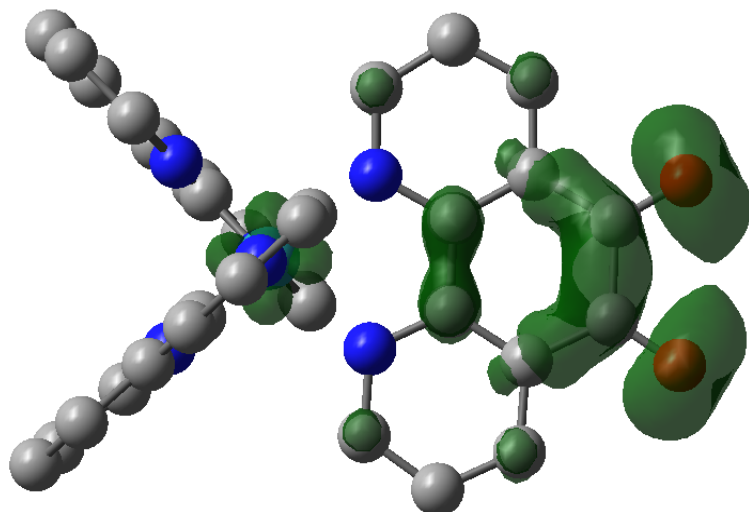

**Figure S1.** Spin density map of the ligand triplet state **3** from DFT calculations.

**Table S1.** Spin densities on dione oxygens and ruthenium highlighting shifts in electron density at the metal and its effect on dione electron density.

| N-N  | Triplet Spin Density (Oxygen) | Triplet Spin Density (Ru) |
|------|-------------------------------|---------------------------|
| deeb | 0.615                         | 0.229                     |
| bpy  | 0.669                         | 0.073                     |
| dmeb | 0.675                         | 0.054                     |

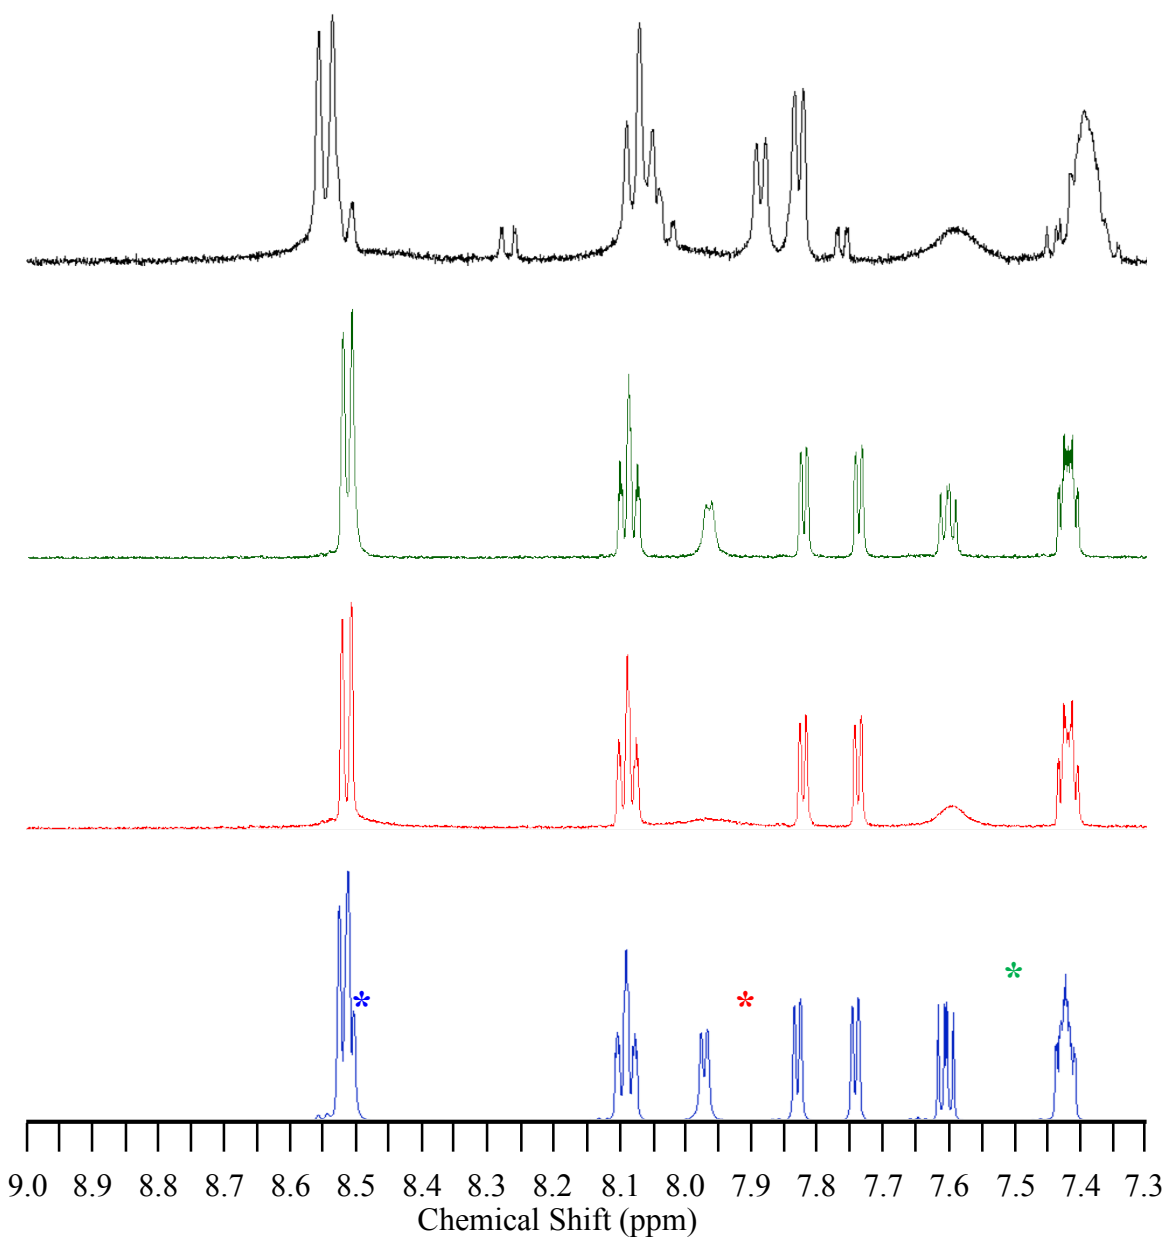

**Supporting Figure S2.** <sup>1</sup>H-NMR spectra of **1** collected at 10 mM in CD<sub>3</sub>CN (blue), 1 mM in CD<sub>3</sub>CN (red), 1 mM in CD<sub>3</sub>CN/0.25% D<sub>2</sub>O (green), and 1 mM in D<sub>2</sub>O (black). Asterisks correspond to the phendione protons as labeled in Figure 1.

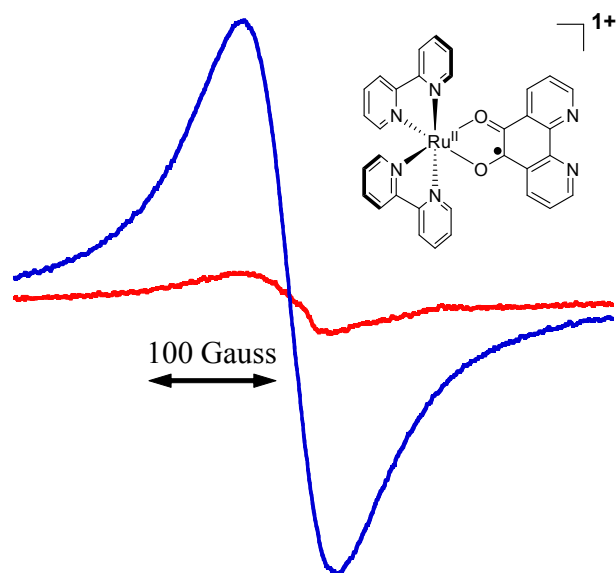

**Supporting Figure S3.** Fluid solution EPR spectra of **5** in anhydrous  $\text{CH}_3\text{CN}$  at 1 mM (red) and 10 mM (blue). Note the *increase* in EPR signal intensity with concentration, expected for a doublet, contrary to the observed *decrease* in intensity observed with **1**.

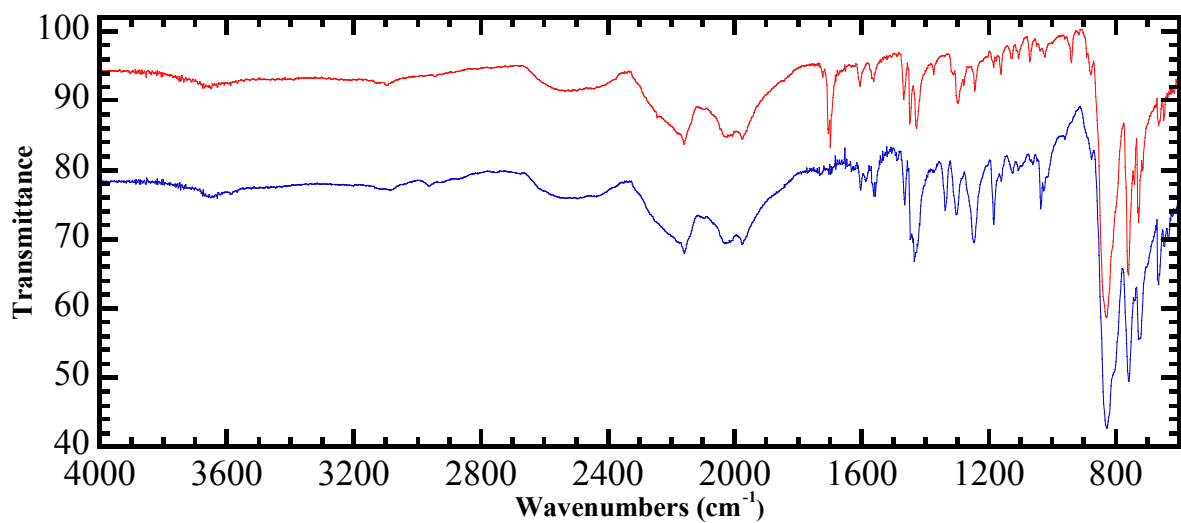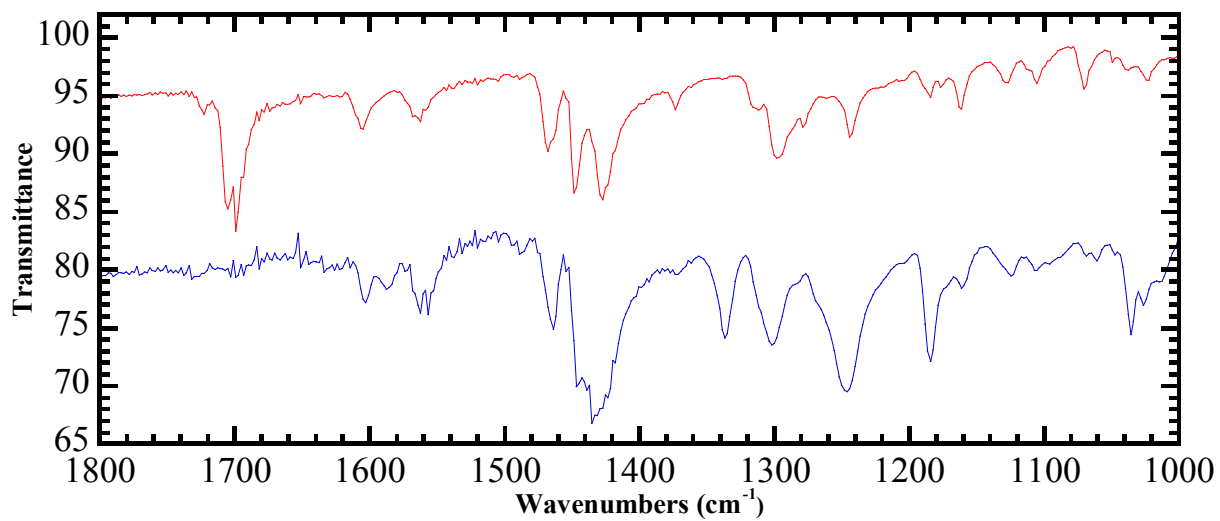

**Supporting Figure S4.** Infrared spectra for solid samples of **1** (red) and **4** (blue). (Top) Full spectral region, (B) Zoom 1800-1000 cm<sup>-1</sup> region.
